# Supplementary material for: Pseudo-complementary PNA actuators as reversible switches in dynamic DNA nanotechnology
Source: PubMed Central journal article supplement — Nucleic Acids Res. 2013 Feb 26;41(8):4729–39. doi: 10.1093/nar/gkt121 (PMC3632119; doi:10.1093/nar/gkt121), 2013-02-26
Supplement: supp_gkt121_nar-03007-f-2012-File008.pdf [file supp_gkt121_nar-03007-f-2012-File008.pdf]

# Pseudo-complementary PNA actuators as reversible switches in dynamic DNA nanotechnology

Damian Ackermann, Michael Famulok\*

LIMES Institute, Chemical Biology and Medicinal Chemistry Unit, c/o Kekulé Institute of Organic Chemistry and Biochemistry, University of Bonn, Gerhard-Domagk-Strasse 1, 53121 Bonn, Germany

|                                                                                   |      |
|-----------------------------------------------------------------------------------|------|
| CONTENT.....                                                                      | PAGE |
| Supplementary Table T1 - Oligonucleotides used in this study.....                 | 2    |
| Supplementary Figure S1 - Crystal structure of 2-thiothymidine ( <b>10</b> )..... | 3    |
| Supplementary Figure S2 - Secondary structure of PGR gap-ring.....                | 4    |
| Supplementary Figure S3 - Secondary structure of spherical stoppers.....          | 5    |
| Supplementary Figure S4 - PAGE of pcRod assembly.....                             | 6    |
| Supplementary Figure S5 - PAGE of macrocycle invasion studies.....                | 7    |
| Supplementary Methods - Synthesis of thiouracil monomer ( <b>1</b> ).....         | 8    |

Supplementary Table T1 – Oligonucleotides used in this study

| name                     | sequence                                                         |
|--------------------------|------------------------------------------------------------------|
| <b>spherical stopper</b> |                                                                  |
| Ring1 r (56)             | 5'phos-CGCGCTTTTTGCGCGTTTTTCCGTCTTTTTGGCACTTTTTTCTCGCTTTTAGAT    |
| RingSE a (54)            | 5'phos-GACGGAAAACTGTCAAAAAATGTTCAAAAAGTGCAGCACCTCACGTCTCATGG     |
| RingSE b (52)            | 5'phos-TCGTGCCATGAGACGTGAGGTGCTGCTGGAAAAATATCTAAAAAGCGAGAA       |
| GE-1 (39)                | 5'phos-AAGCGAGAAAAAAGTGCCAAAAAGACGGAAAAACGCGC                    |
| GE-2 (42)                | 5'phos-AAAAAGCGCGAAAAAAGGGTCTTTTTGGCACTTTTTTCTCGC                |
| GE-3 (45)                | 5'phos-TTTTAGATATTTTTTCCAACCTTTTGAACATTTTTTGACAGTTT              |
| GE-4 (42)                | 5'phos-TTCCGTCTTTTTGCGTCAAAAAGTTGGAAAAATATCTAAA                  |
| HJalpha b (53)           | 5'phos-AAAAGTGCCAAAAAGACCAAAAAGTGTCAAAAACGGAGAAAAATGTTCAAAA      |
| HJalpha c (61)           | 5'phos-TTCCATATTTTTGAACATTTTTCTCCGTTTTTGGAGTTTTTGGCGGAAAAACGCGC  |
| HJalpha d (33)           | 5'phos-CGCGCTTTTTGCGCGTTTTTCCGCCCTTTTT                           |
| Bogen f (47)             | 5'phos-AAAAAGCGCGAAAAAAGGGCCAAAAAGTGTCAAAAACGGAGAAAAA            |
| Bogen r (47)             | 5'phos-TTTTTGAACATTTTTCTCCGTTTTTGGAGTTTTTGGCCCTTTTT              |
| HJbeta a (56)            | 5'phos-AATATGGAAAAACGCGCAAAAAGACGGAAAAAGTGTCAAAAATGTCGCAAAAAA    |
| HJbeta kc (32)           | 5'phos-ATTTTTTCCAACCTTTTGGAGCTTTTCCATAT                          |
| HJbeta kd (60)           | 5'phos-TGTTCAAAAATATGGAAAAAGCACATTTTTTGGAGTTTTTCCGTCTTTTTGCGCGTT |
| <b>PGR126</b>            |                                                                  |
| AGRalpha f (57)          | 5'-AAATAATGAAAAAGTGTCAAAAAGACGGAAAAACGCGCAAAAAGCGCGAAAAAAG       |
| AGRalpha r (47)          | 5'phos-TTTGGCCCTTTTTTCCGCGCTTTTTGCGCGTTTTTCCGTCTTTTTGG           |
| AGRbeta f (55)           | 5'phos-GGCCAAAAAGTGTCAAAAAGACGGAAAAAGTGTCAAAAATGTTCAAAAAGCGG     |
| AGRbeta r (35)           | 5'phos-ATTTTTTGGAGTTTTTCCGTCTTTTTGCCAGTT                         |
| PGRgamma r (44)          | 5'phos-CACTTTTTTCAATTATTTCCGAGTTACAACCTCCGCTTTTTGAAC             |
| PGR-RO p (14)            | 5'phos-AGTTGTAACCGGA                                             |
| <b>pcRod</b>             |                                                                  |
| EFCT-2 (25)              | 5'phos-CACGATCCAGGTACAGTAACTGTCA                                 |
| EFCT-1 (20)              | 5'-TTAGTTCACAGGGATAACAG                                          |
| rodA-DNA (19)            | 5'phos-CACGACTGTTATCCCTGTG                                       |
| SD5-DNA (20)             | 5'phos-AACTAASGSDDCSCTGACTG                                      |
| rodC-DNA (14)            | 5'phos-TTGCTGTACCTGGA                                            |
| pc-anti-RO (14)          | 5'TCDDCDSSGDGCCT                                                 |
| <b>PNA</b>               |                                                                  |
| psiPNA (14)              | NH <sub>2</sub> -Lys-TCDDCDSSGDGCCT-Lys-H                        |

S: 2-thiouracil (for PNA); 2-thiothymine (for DNA). D: 2,6-diaminopurin.

PNA: -NH<sub>2</sub> = carboxy end (carboxamide); -H = amino end.

Figure S1  
**PAGE of pcRod assembly**

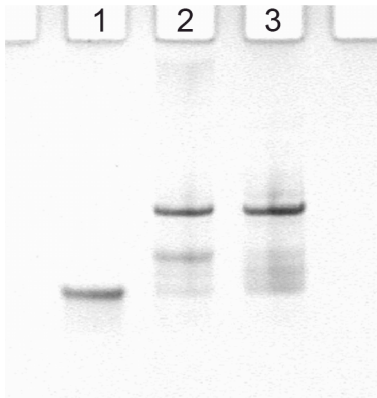

10% PAGE of pcRod assembly. Lane 1: mixture of unligated ODNs; lane 2: product of ligation, main band corresponds to pcRod; lane 3: reference DNA rod (EFCT-1 and EFCT-2 hybridized with a corresponding unmodified 53-mer DNA strand).

Figure S2  
Secondary structure of PGR gap-ring

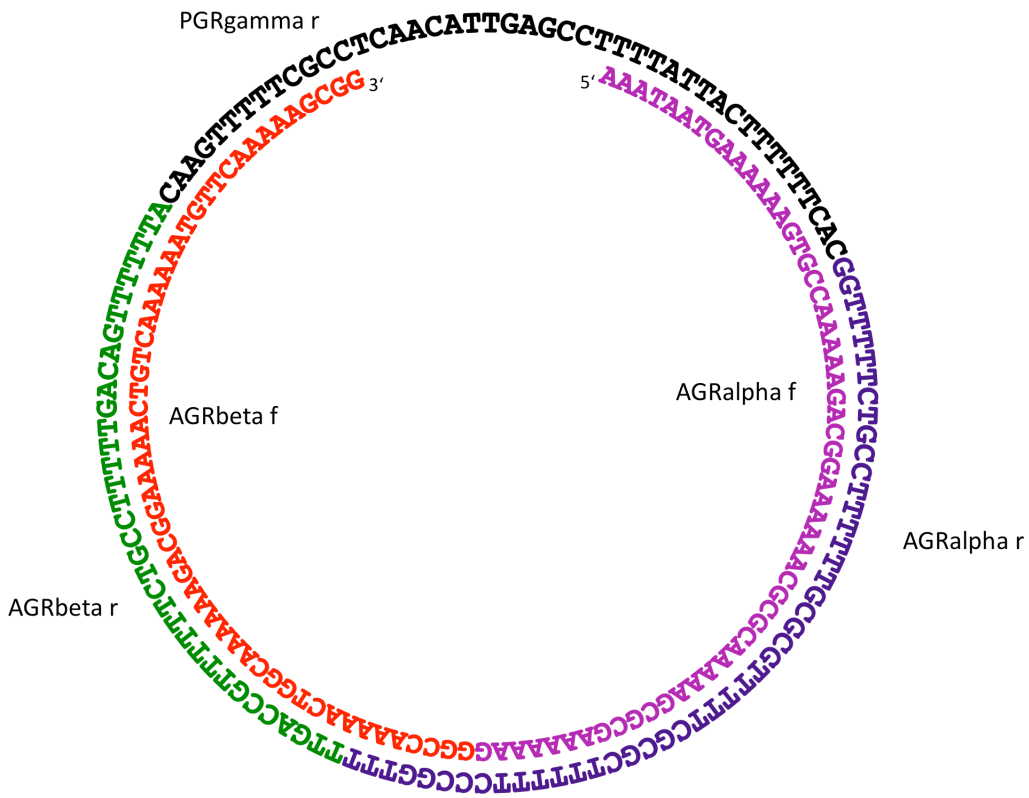

Figure S3  
**Secondary structure of spherical stoppers**

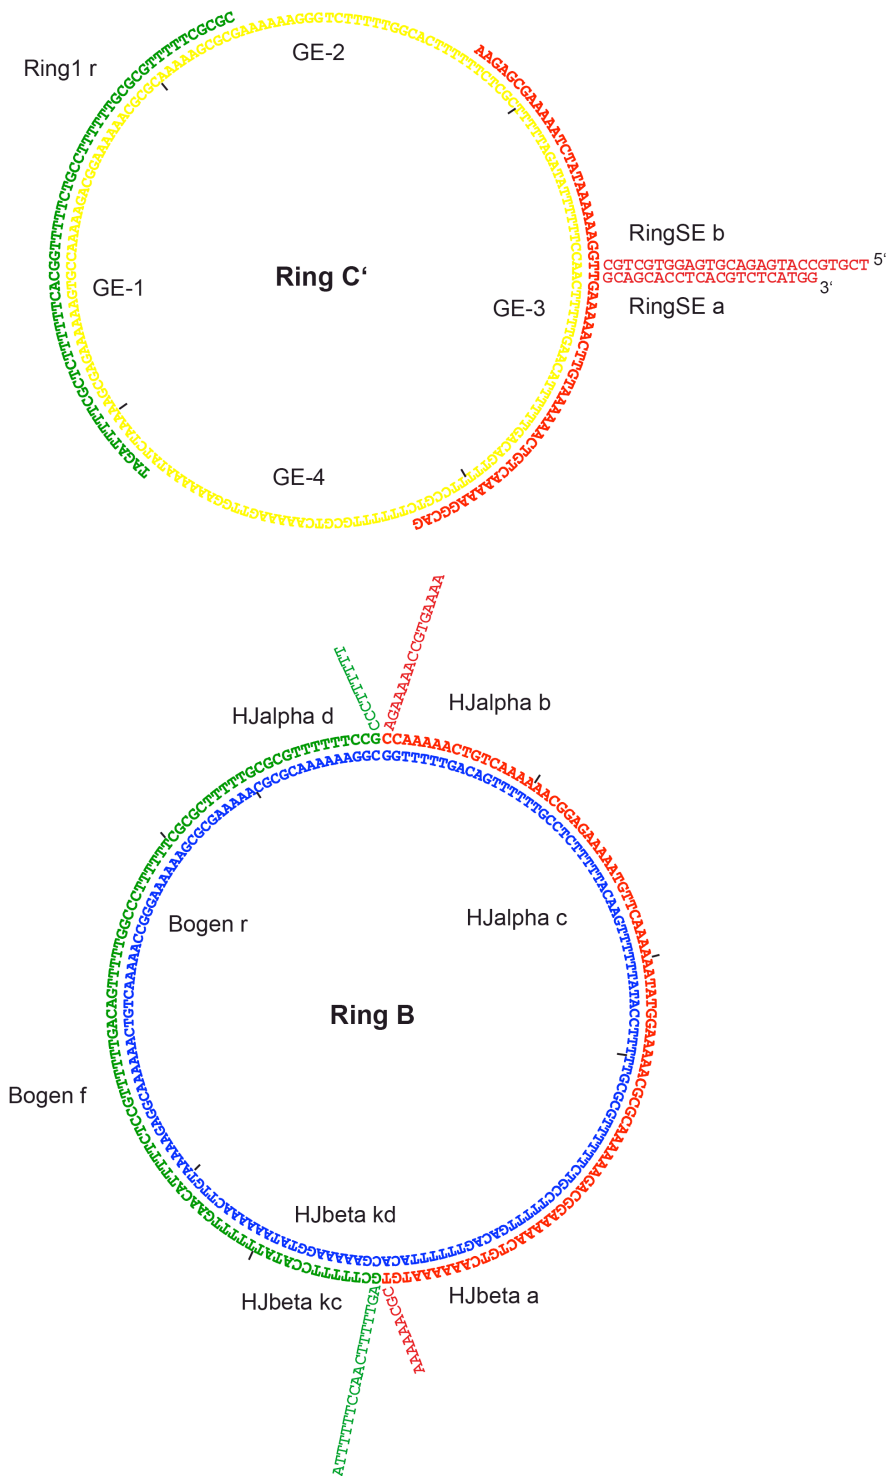

Figure S4  
**Crystal structure of 2-thiothymidine (10)**  
 Measured on a Nonius KappaCCD.

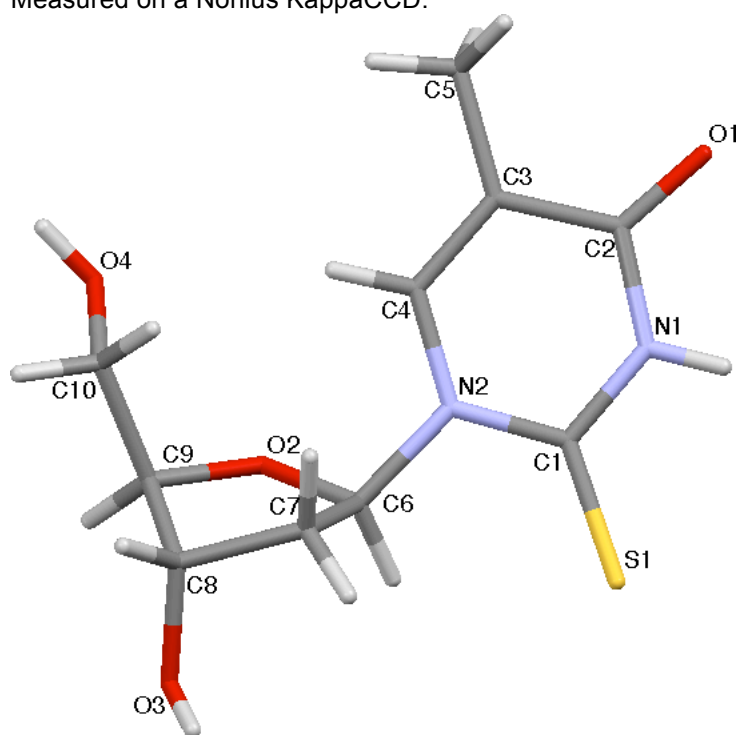

Table of atomic coordinates ( $\times 10^4$ ) for **10**.

|       | x     | y    | z    |
|-------|-------|------|------|
| C(1)  | 10826 | 1030 | 3923 |
| C(2)  | 13446 | 477  | 1605 |
| C(3)  | 13953 | 1245 | 990  |
| C(4)  | 12860 | 1842 | 1793 |
| C(5)  | 15682 | 1345 | -538 |
| C(6)  | 10134 | 2434 | 4029 |
| C(7)  | 12137 | 2820 | 5795 |
| C(8)  | 11347 | 3668 | 5498 |
| C(9)  | 10539 | 3740 | 3185 |
| C(10) | 12976 | 3943 | 2356 |
| N(1)  | 11898 | 431  | 3059 |
| N(2)  | 11289 | 1742 | 3212 |
| O(1)  | 14251 | -129 | 974  |
| O(2)  | 9423  | 2987 | 2449 |
| O(3)  | 8980  | 3834 | 6272 |
| O(4)  | 12288 | 3871 | 197  |
| S(1)  | 9102  | 865  | 5715 |

Figure S5

**PAGE of macrocycle invasion studies**

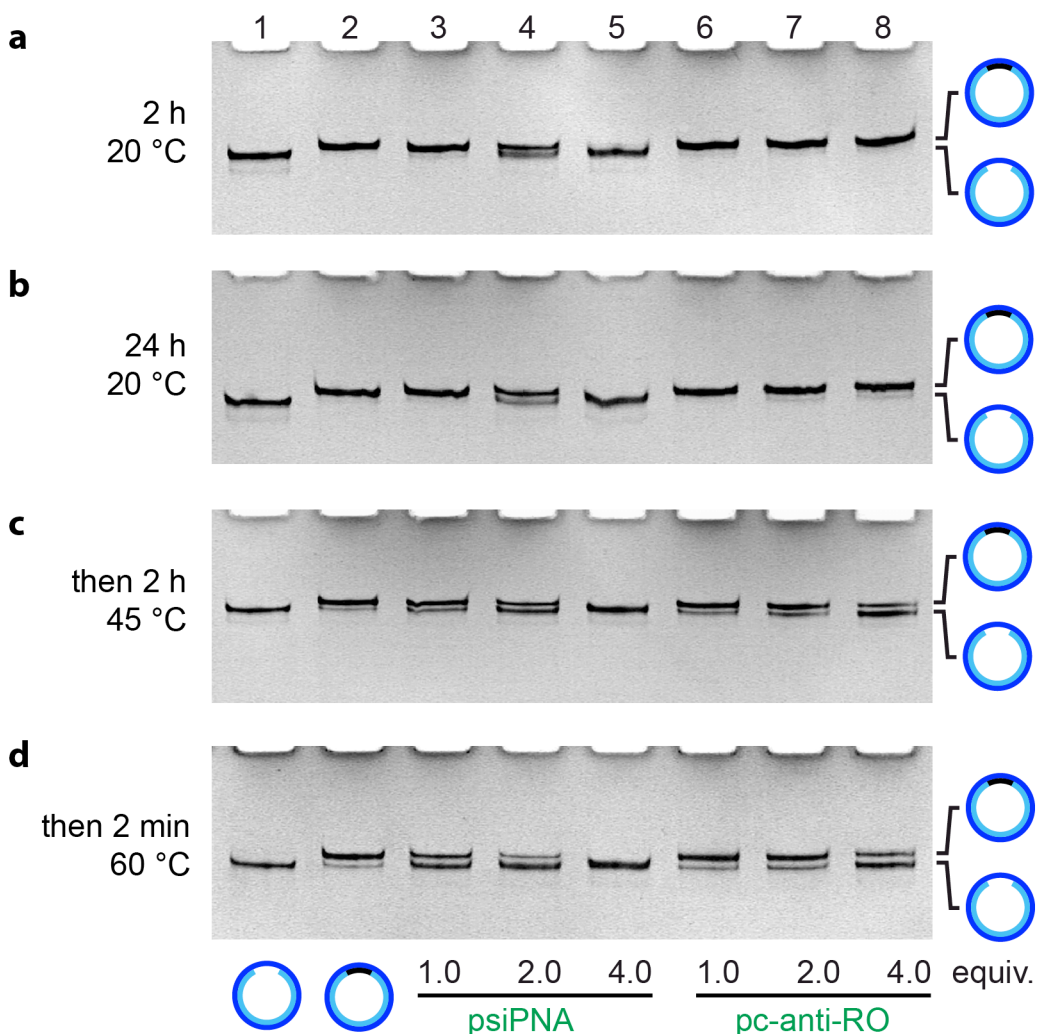

Polyacrylamide gels (10 %) of the macrocycle invasion studies after incubation at indicated conditions. Lane 1: PGR (reference). Lane 2: PGR·PGR-RO nanoring. Lane 3-5: dsDNA nanoring incubated with 1.0, 2.0, and 4.0 equiv. of psiPNA. Lane 6-8: dsDNA nanoring incubated with 1.0, 2.0, and 4.0 equiv. of pc-anti-RO.

At 20 °C the displacement occurs only in the presence of psiPNA but not pc-anti-RO (a). Even after 24 h the pc-anti-RO does not displace the oligo from the macrocycle (b). When the sample is warmed up to 45 °C for 2 h, partial displacement occurs also in case of pc-anti-RO (c). In PAGE (d) the samples were warmed up to 60 °C for only 2 min. At this temperature the PGR-RO and the macrocycle are completely dissociated so that all involved components re-hybridize “statistically” in the thermodynamically favoured state. This is reflected by the band intensities given for free gap-ring and the full macrocycle. In PAGE (c) the PGR-RO partially dissociates from the macrocycle and represents an intermediary event between (a) and (d).

## Supplementary Methods

### Synthesis of 2-thiouracil PNA monomer (1)

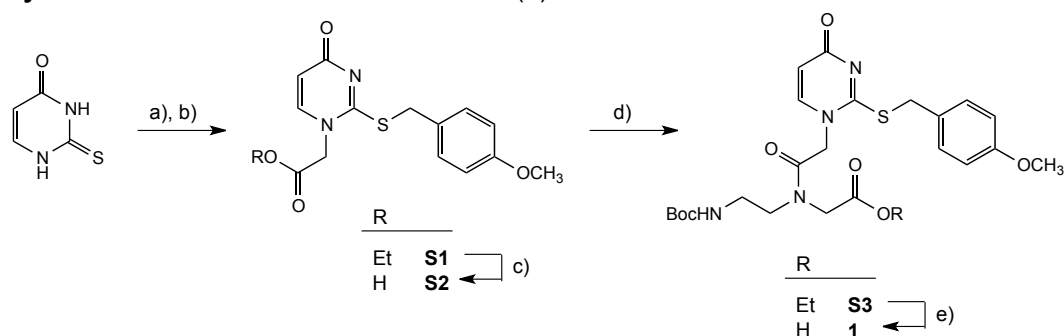

**Scheme S1.** a) NaOH, 4-methoxybenzyl chloride, EtOH/H<sub>2</sub>O (1:1), 45 °, 60 min, 77%. b) NaH, ethyl bromoacetate, CH<sub>3</sub>CN, 0 ° → rt, 2 h, 40%. c) 2.0 M LiOH, THF/MeOH (1:1), rt, 10 min, 51%. d) Ethyl *N*-(Boc-aminoethyl)glycinate, HBTU, DMF, EtN<sup>i</sup>Pr<sub>2</sub>, rt, 2h, 80%. e) 2.0 M LiOH, THF, 0 °, 6 min, 77%.

***N*-1-(Ethylloxycarbonylmethyl)-*S*-(4-methoxybenzyl)-2-thiouracil (**S1**).** A solution of 2-thiouracil (19.4 g, 151 mmol) in EtOH (90 ml) was mixed with a solution of NaOH (7.2 g, 166 mmol) in H<sub>2</sub>O (90 ml) and warmed to 45 °C. 4-Methoxybenzyl chloride (22.7 ml, 180 mmol) was added during 5 min and the suspension stirred for 60 min at 45 °C. After removing EtOH under reduced pressure, the mixture was neutralized by the addition of sat. aq. NaHCO<sub>3</sub> soln. The product was filtered, washed 2 x with H<sub>2</sub>O and 3 x with Et<sub>2</sub>O to give the Pmb-protected 2-thiouracil (28.9 g, 77%) as white solid. This intermediate (13.4 g, 54 mmol) was suspended in CH<sub>3</sub>CN (170 ml), cooled to 4 °C, and slowly treated with freshly activated NaH (from NaH 60% dispersion in mineral oil, 2.27 g, 56.7 mmol) and then allowed to warm to room temperature. Ethyl bromoacetate (9.0 ml, 81 mmol) was drop wise added during 10 min. After stirring for 120 min the reaction was stopped by neutralization with 1.0 M aq. phosphate buffer soln. (200 ml, pH 7.0). The mixture was filtered and, after removal of CH<sub>3</sub>CN under reduced pressure, partitioned between CH<sub>2</sub>Cl<sub>2</sub>/PrOH 9:1 (200 ml) and the aq. phosphate buffer. The organic layer was dried with MgSO<sub>4</sub>, evaporated under reduced pressure and the crude was adsorbed on SiO<sub>2</sub> (30 g). CC (silica gel (150 g), CH<sub>2</sub>Cl<sub>2</sub> → CH<sub>2</sub>Cl<sub>2</sub>/MeOH 94:6) gave **S1** (7.1 g, 40%) as yellow oil. <sup>1</sup>H-NMR (300 MHz, DMSO-*d*<sub>6</sub>) δ 7.72 (d, *J* = 7.5 Hz, 1H, H-C(6)), 7.47 - 7.30 (m, 2H, arom. H), 7.00 - 6.84 (m, 2H, arom. H), 5.99 (d, *J* = 7.5 Hz, 1H, H-C(5)), 4.84 (s, 2H, NCH<sub>2</sub>), 4.41 (s, 2H, BnCH<sub>2</sub>), 4.22 (q, *J* = 7.1 Hz, 2H, OCH<sub>2</sub>CH<sub>3</sub>), 3.78 (s, 3H, OCH<sub>3</sub>), 1.23 (t, *J* = 7.1 Hz, 3H, OCH<sub>2</sub>CH<sub>3</sub>). <sup>13</sup>C-NMR (75 MHz, DMSO-*d*<sub>6</sub>) δ 167.41, 166.79, 162.72, 159.12, 145.97, 130.85, 128.35, 114.33, 109.11, 62.14, 55.52, 52.87, 40.86, 34.79, 14.34. ESI-MS (pos.) 335.1 ([M+H]<sup>+</sup>, C<sub>16</sub>H<sub>19</sub>N<sub>2</sub>O<sub>4</sub>S<sup>+</sup>; calc. 335.1).

***N*-1-(Carboxymethyl)-*S*-(4-methoxybenzyl)-2-thiouracil (**S2**).** A solution of **S1** (7.1 g, 21.2 mmol) in THF/MeOH 1:1 (200 ml) was treated with 2.0 M aq. LiOH soln. (23 ml) for 10 min. at room temperature. After addition of 1.0 M aq. HCl (46 ml) the organic solvents were slowly removed under reduced pressure whereby the product precipitated. The solid was filtered, washed 2 x with H<sub>2</sub>O and 3 x with Et<sub>2</sub>O to give **S2** (3.30 g, 51%) as white powder. <sup>1</sup>H-NMR (400 MHz, DMSO-*d*<sub>6</sub>) δ 13.6 (br. s, 1H, COOH), 7.67 (d, *J* = 7.5 Hz, 1H), 7.39 - 7.26 (m, 2H, arom. H), 6.95 - 6.79 (m, 2H, arom. H), 5.92 (d, *J* = 7.5 Hz, 1H, H-C(5)), 4.66 (s, 2H, CH<sub>2</sub>N(1)), 4.34 (d, *J* = 5.4 Hz, 2H, BnCH<sub>2</sub>), 3.72 (s, 3H, OCH<sub>3</sub>). <sup>13</sup>C-NMR (101 MHz, DMSO) δ 168.37, 166.58, 162.37, 158.70, 145.71, 130.46, 127.95, 113.94, 108.55, 55.11, 52.61, 34.36. ESI-MS (pos.) 307.0 ([M+H]<sup>+</sup>, C<sub>14</sub>H<sub>15</sub>N<sub>2</sub>O<sub>4</sub>S<sup>+</sup>; calc. 307.1).

**Ethyl-*N*-(2-(*t*-butyloxycarbonylamino)ethyl)-*N*-(*S*-(4-methoxybenzyl)-2-thiouracil-1-ylacetyl)glycinate (**S3**).** A solution of **S2** (3.30 g, 10.7 mmol) and EtN<sup>i</sup>Pr<sub>2</sub> (1.67 g, 12.9 mmol) in DMF (30 ml) was treated with HBTU (4.9 g, 12.9 mmol) for 5 min at room temperature. Then a solution of ethyl *N*-(Boc-aminoethyl)glycinate (3.18 g, 12.9 mmol) in DMF (10 ml) was added and the mixture stirred at room temperature for 18 h. The mixture was partitioned between CH<sub>2</sub>Cl<sub>2</sub> and sat. aq. NaHCO<sub>3</sub> soln., the organic layer washed with 10% aq. citric acid soln., dried with MgSO<sub>4</sub> and evaporated under reduced pressure. The crude was adsorbed on SiO<sub>2</sub> (20 g). CC (silica gel (75 g), CH<sub>2</sub>Cl<sub>2</sub> → CH<sub>2</sub>Cl<sub>2</sub>/MeOH 98:2) gave **S3** (4.63 g, 80%) as yellow foam. <sup>1</sup>H-NMR (400 MHz, DMSO-*d*<sub>6</sub>) δ 7.48 and 7.46 [d (maj/min), *J* = 7.5 Hz, 1H, H-C(6)] 7.34 - 7.30 (m, 2H, arom. H), 6.90 and 6.71 [t (maj/min), *J* = 5.9 Hz, 1H, NHBoc], 6.88 - 6.84 (m,



2H, arom. H), 5.91 and 5.89 [d (maj/min),  $J = 7.5$  Hz, 1H, H-C(5)], 4.96 and 4.76 [s (maj/min), 2H, CH<sub>2</sub>N(1)], 4.34, and 4.26 [s (maj/min), 2H, BnCH<sub>2</sub>], 4.12 [q (min),  $J = 7.1$  Hz, 0.66H, OCH<sub>2</sub>CH<sub>3</sub>], 4.08 - 4.02 [m, 3.33H, CH<sub>2</sub>COOEt, (maj) OCH<sub>2</sub>CH<sub>3</sub>], 3.72 (s, 3H, OCH<sub>3</sub>), 3.39 - 3.29 (overlaid with H<sub>2</sub>O signal), and 3.17 - 3.14 and 3.02 - 3.00 (2m, 4H, NCH<sub>2</sub>CH<sub>2</sub>N), 1.35 and 1.32 [s (min/maj), 9H, C(CH<sub>3</sub>)<sub>3</sub>], 1.17 and 1.15 [t (min/maj),  $J = 7.1$  Hz, 3H, OCH<sub>2</sub>CH<sub>3</sub>]. <sup>13</sup>C-NMR (101 MHz, DMSO-*d*<sub>6</sub>) δ 169.55 and 169.13 (min/maj), 167.03 and 166.99 (maj/min), 166.58 and 166.29 (min/maj), 163.10, 159.09, 156.16, 146.20 and 146.15 (min/maj), 130.85, 128.33, 114.34 and 114.31 (maj/min), 108.94 and 108.90 (maj/min), 78.51 and 78.21 (maj/min), 61.67 and 61.00 (min/maj), 55.51 and 55.33 (maj/min), 53.06 and 52.67 (min/maj), 49.44, 48.37, 47.44, 38.57 and 37.96 (maj/min), 34.91, 28.62 and 28.55 (min/maj), 14.42 and 14.39 (maj/min). ESI-MS (pos.) 535.4 ([M+H]<sup>+</sup>, C<sub>25</sub>H<sub>35</sub>N<sub>4</sub>O<sub>7</sub>S<sup>+</sup>; calc. 535.2).

***N*-(2-(*t*-butyloxycarbonylamino)ethyl)-*N*-(*S*-(4-methoxybenzyl)-2-thiouracil-1-ylacetyl)glycine (1). S3** (2.79 g, 5.2 mmol) was dissolved in THF/H<sub>2</sub>O 2:1 (65 ml), cooled to 4 °C and treated with 2.0 M aq. LiOH soln. (7.8 ml). After stirring for 10 min at 4 °C the reaction was neutralized by the addition of 1.0 M aq. HCl soln. (15.6 ml) and the mixture evaporated to dryness. The crude was suspended in CH<sub>2</sub>Cl<sub>2</sub>/PrOH 9:1 (50 ml) by sonication. After addition of EtOAc (100 ml) the solid was filtered, washed 3 x with H<sub>2</sub>O and 3 x with Et<sub>2</sub>O to give the **1** (2.04 g, 77%) as white powder. <sup>1</sup>H-NMR (400 MHz, DMSO-*d*<sub>6</sub>) δ 12.7 (br. s, 1H, COOH), 7.49 and 7.45 [d (maj/min),  $J = 7.6$  Hz, 1H, H-C(6)], 7.35 - 7.31 (m, 2H, arom. H), 6.91 and 6.72 [t (maj/min),  $J = 5.9$  Hz, 1H, NHBoc], 6.88 - 6.84 (m, 2H, arom. H), 5.91 and 5.89 [d (maj/min),  $J = 7.6$  Hz, 1H, H-C(5)], 4.95 and 4.75 [s (maj/min), 2H, CH<sub>2</sub>N(1)], 4.34, and 4.32 [s (maj/min), 2H, BnCH<sub>2</sub>], 4.13 and 3.97 [s (min/maj), 2H, CH<sub>2</sub>COO], 3.72 (s, 3H, OCH<sub>3</sub>), 3.36 and 3.30 [t (maj/min),  $J = 6.6$  Hz, 2H, NCH<sub>2</sub>CH<sub>2</sub>NH], 3.18 - 3.13 and 3.03 - 2.99 [m (maj/min), 2H, NCH<sub>2</sub>CH<sub>2</sub>NH], 1.35 and 1.32 [s (min/maj), 9H, C(CH<sub>3</sub>)<sub>3</sub>]. <sup>13</sup>C-NMR (101 MHz, DMSO-*d*<sub>6</sub>) δ 170.71 and 170.25 (min/maj), 166.67 and 166.63 (min/maj), 166.16 and 165.72 (maj/min), 162.76 and 162.72 (min/maj), 163.10 and 159.09 (maj/min), 156.76 and 155.57 (maj/min), 145.84 and 145.80 (min/maj), 130.45 and 130.43 (maj/min), 128.04 and 127.94 (maj/min), 113.94 and 113.92 (maj/min), 108.52 and 108.45 (maj/min), 78.08, and 77.78 (maj/min), 55.10, 52.64 and 52.30 (min/maj), 49.22 and 47.68 (min/maj), 47.06 and 46.91 (min/maj), 38.10 and 37.52 (maj/min), 34.54, 34.49 (min/maj), 28.23 and 28.16 (min/maj). ESI-MS (pos.) 507.3 ([M+H]<sup>+</sup>, C<sub>23</sub>H<sub>31</sub>N<sub>4</sub>O<sub>7</sub>S<sup>+</sup>; calc. 507.2).
